# Supplementary material for: Possible role of PPARγ in the negative regulation of ovulatory cascade and luteal development in rats
Source: PubMed Central journal article supplement — J Vet Med Sci. 2017 May 19;79(6):1043–51. doi: 10.1292/jvms.17-0162 (PMC5487780; doi:10.1292/jvms.17-0162), 2017-05-19
Supplement: jvms-79-1043-s001.pdf [file jvms-79-1043-s001.pdf]

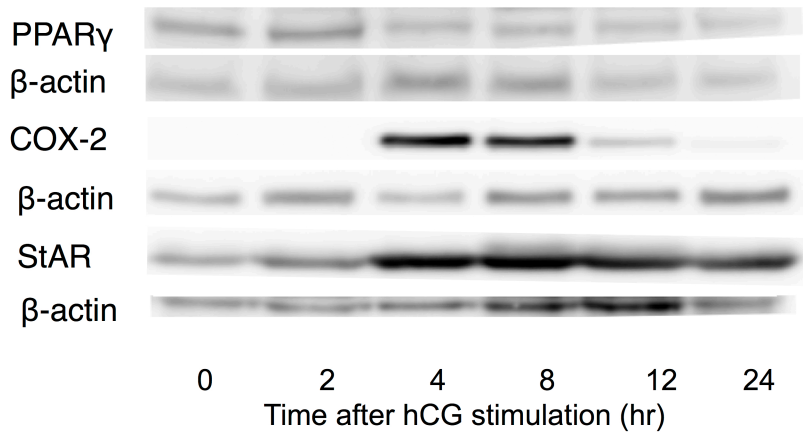

Supplementary Fig. 1 Typical immunoblots of ovarian three proteins expression in the time course of hCG treatment

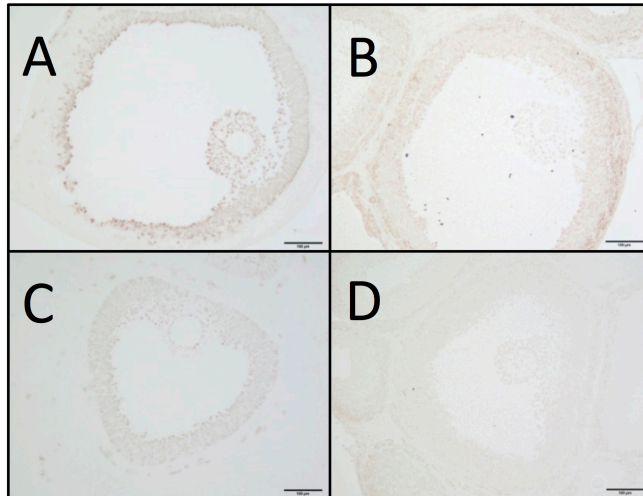

Supplementary Fig.2 COX-2 and StAR immunostaining of preovulatory follicles

Rats were intrabursally treated with vehicle (A, B) or rosiglitazone (C, D) at hCG0h. Ovaries sampled at hCG8h were immunohistochemically examined for COX-2 (A, C) or StAR (B, D). Scale bar : 100  $\mu$ m.

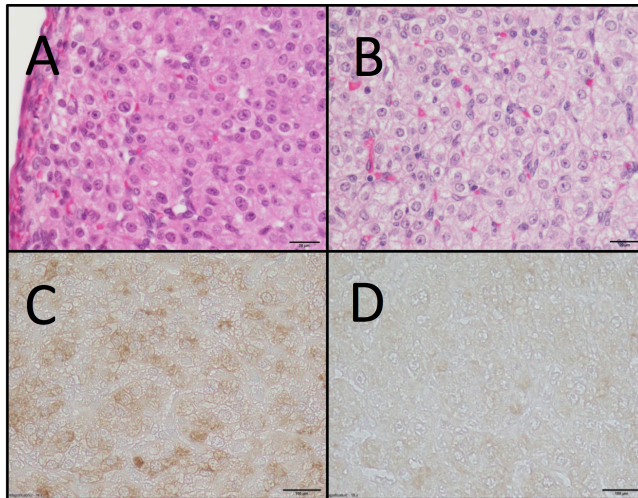

Supplementary Fig.3 HE and StAR immunostaining of CL  
Rats were intrabursally treated with vehicle (A, C) or rosiglitazone (B, D) at hCG24h. Ovaries were sampled at hCG72h and HE-stained (A, B) or immunostained for StAR expression (C, D). Scale bars: 20  $\mu\text{m}$  (A, B), 100  $\mu\text{m}$  (C, D).
